# Supplementary material for: Inhibition of AMPK/PFKFB3 Mediated Glycolysis Synergizes with Penfluridol to Suppress Gallbladder Cancer Growth
Source: Research Square preprint supplement (doi:10.21203/rs.3.rs-1119219/v1), 2021-12-06
Supplement: Supplementary file 1 [file 4f5211b7652c2e728ef80980.docx]

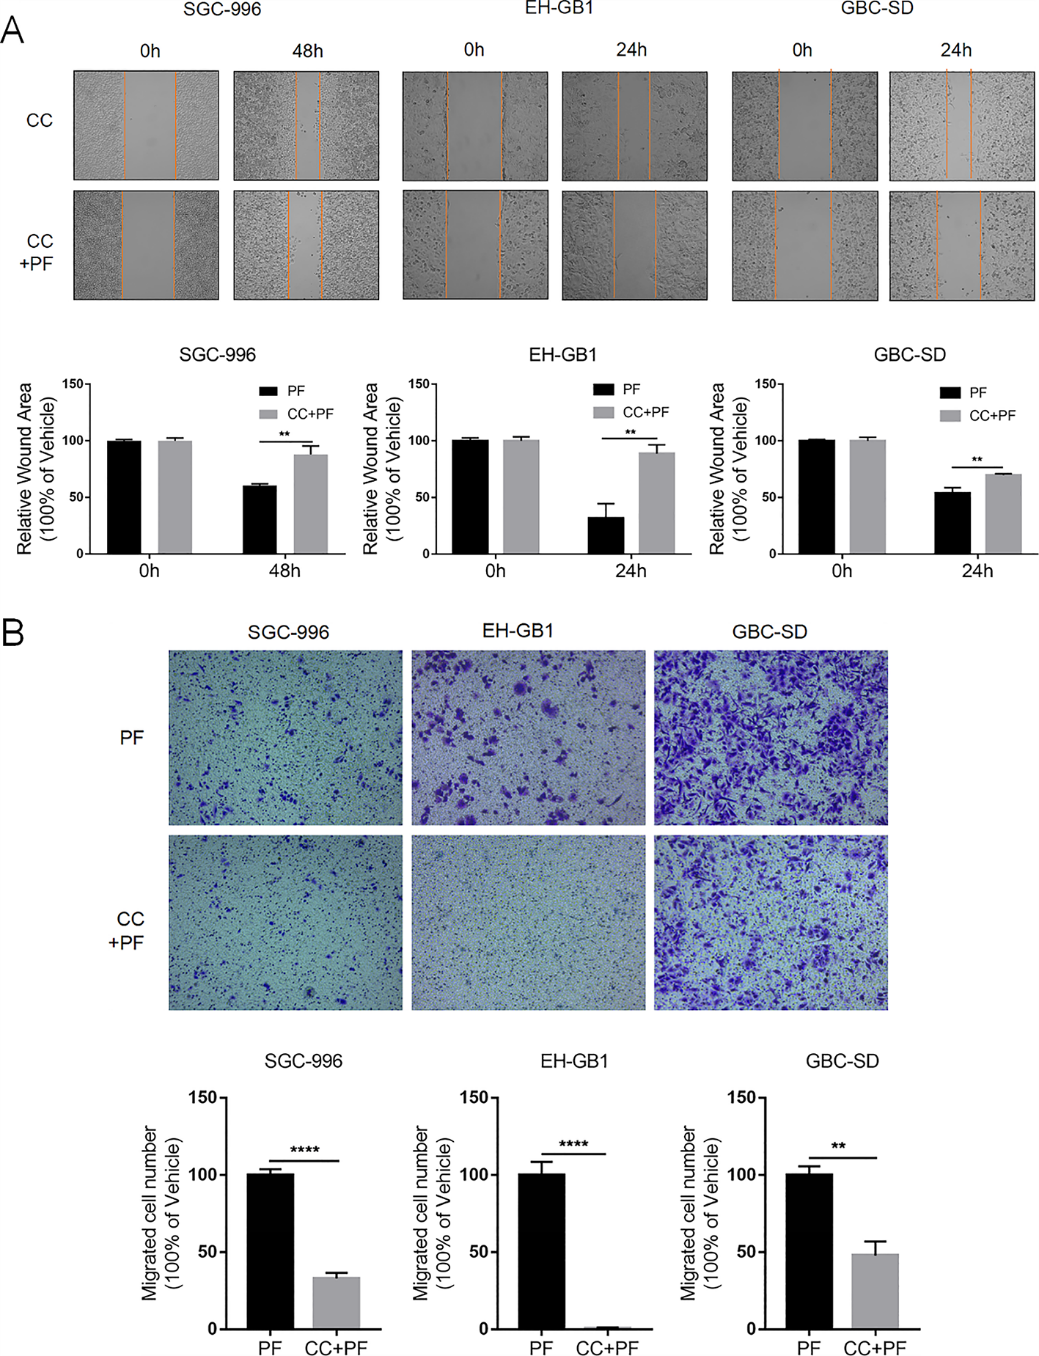


**Fig. S3 AMPK inhibitor CC enhanced the anti-tumor effect of penfluridol. A** SGC-996, EH-GB1, and GBC-SD cells were pre-treated with 5μM PF with or without CC (10μM) for 12h before seeding into ibidi culture-insert. Wound healing was detected at indicated time after removing insert. **B** SGC-996, EH-GB1, and GBC-SD cells were pre-treated with 5μM PF with or without CC (10μM) for 12h before seeding into Transwell insert. Cellular migration was measured after 48h (for SGC-996) and 24h (for Eh-GB1 and GBC-SD). ***P*<0.01, *****P*<0.0001.
